# Supplementary material for: Perceptual Translucency in 3D Printing Using Surface Texture
Source: MDPI journal article supplement (doi:10.3390/jimaging9050105), 2023-05-22
Supplement: s1 [file s1]

# Supplementary material

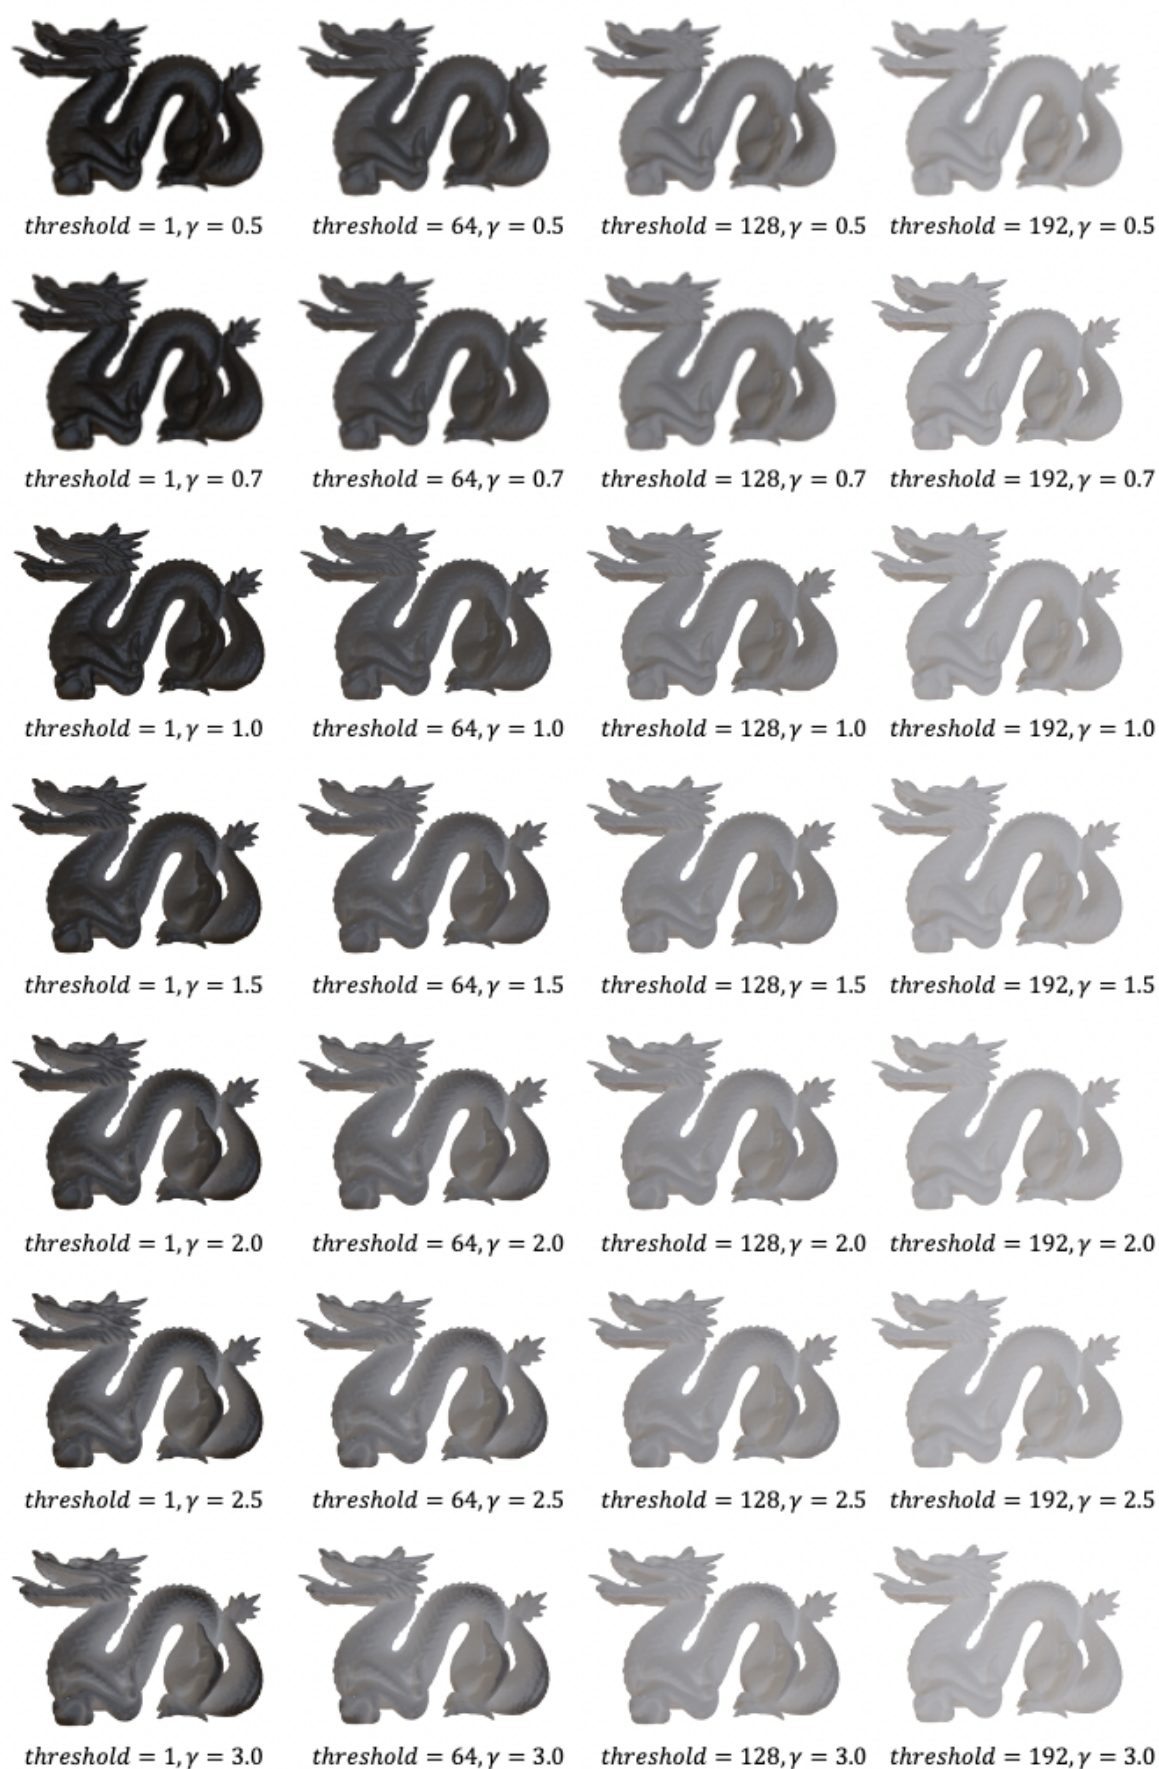

**Figure S1.** All 28 combinations of two parameters used in this study and rendered image with texture applied. *threshold* is the threshold of the gray level value to be used (1-255) and  $\gamma$  is the gamma value used in gamma correction.

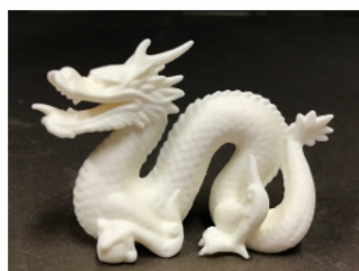

Without Texture

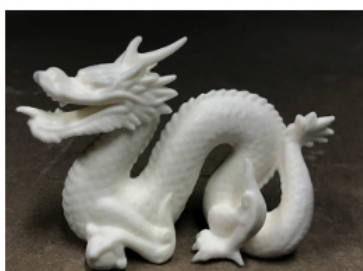

Texture 1

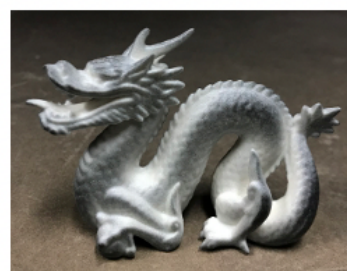

Texture 2

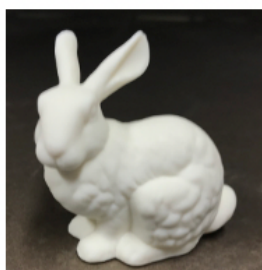

Without Texture

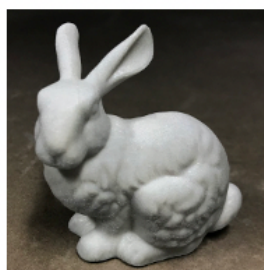

Texture 1

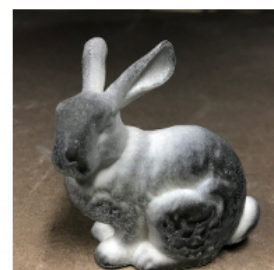

Texture 2

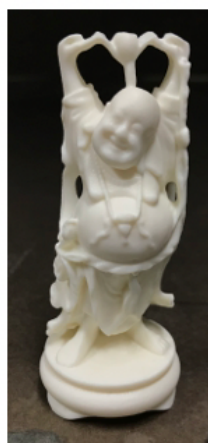

Without Texture

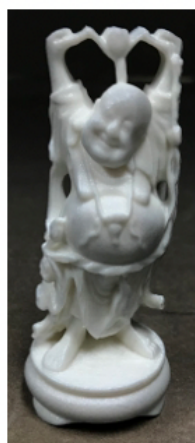

Texture 1

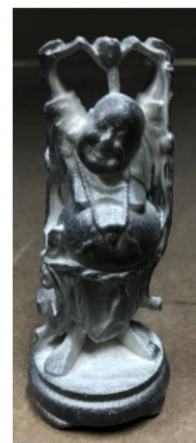

Texture 2

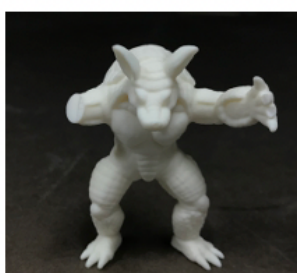

Without Texture

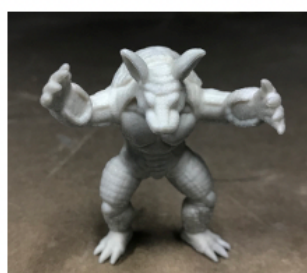

Texture 1

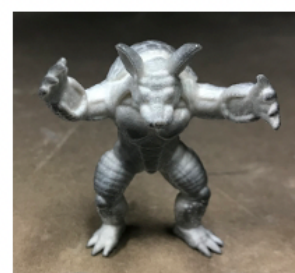

Texture 2

**Figure S2.** All of fabricated samples with diffused lighting (fluorescent light).



## Texture 1

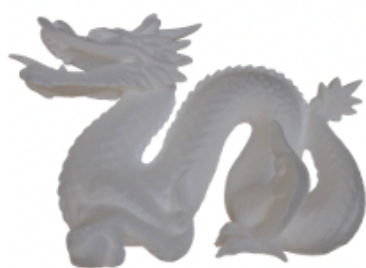

Rendered image  
(diffuse lighting)

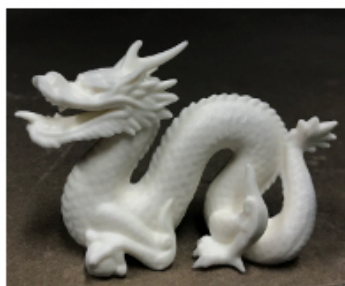

3D printed object  
(diffuse lighting)

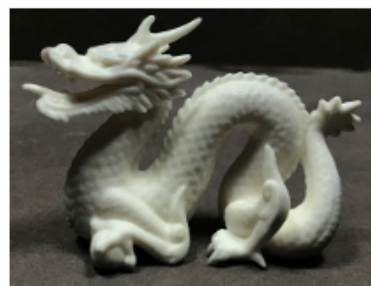

3D printed object  
(Top lighting)

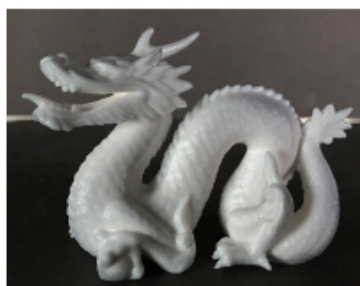

3D printed object  
(Front lighting)

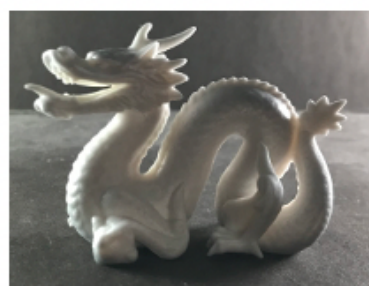

3D printed object  
(Back lighting)

## Texture 2

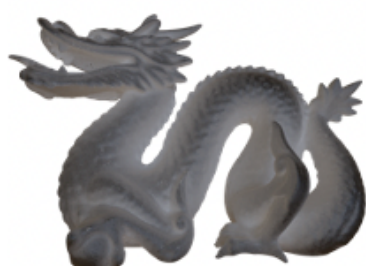

Rendered image  
(diffuse lighting)

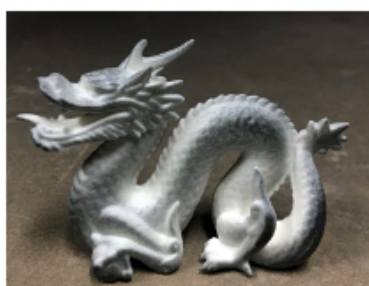

3D printed object  
(diffuse lighting)

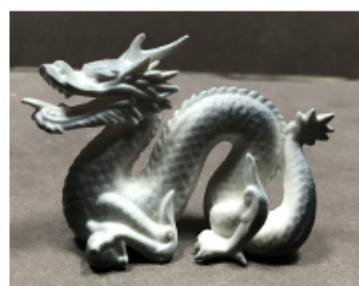

3D printed object  
(Top lighting)

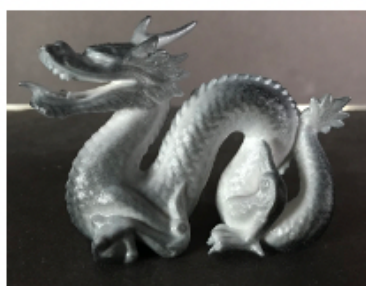

3D printed object  
(Front lighting)

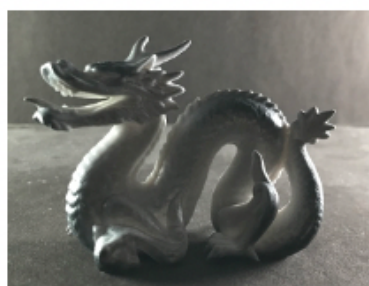

3D printed object  
(Back lighting)

**Figure S3.** Comparison of appearance in the rendering environment and in the four lighting environments used in the experiment.
